# Supplementary material for: Experimental Study on the Effect of Gas Pressure on Ultrasonic Velocity and Anisotropy of Anthracite
Source: Hindawi journal article supplement (doi:10.1155/2019/3183816), 2019-08-19
Supplement: f1 [file 3183816.f1.pdf]

## Supplementary Materials for

### “Experimental Study on the Effect of Gas Pressure on Ultrasonic Velocity and Anisotropy of Anthracite”

Bo Wang,<sup>1</sup> Jialin Hao,<sup>1</sup> Shengdong Liu,<sup>1</sup> Fubao Zhou,<sup>2</sup> Zhendong Zhang,<sup>1</sup> Heng Zhang,<sup>1</sup> Huachao Sun<sup>1</sup>

<sup>1</sup>State Key Laboratory for Geomechanics & Deep Underground Engineering and School of Resource and Earth Science, China University of Mining and Technology, Xuzhou, Jiangsu Province 221116, China

<sup>2</sup>School of Safety Engineering, China University of Mining and Technology, Xuzhou, Jiangsu Province 221116, China

Correspondence should be addressed to Bo Wang; wbsyes@126.com

**This PDF file includes:**

Table 4 (Section 3.3 of the corresponding manuscript, Figure 7)

Table 4: Velocity anisotropy values of  $V_p$  and  $V_s$  of coal samples.

|      | $AV_p$ (%) |      |      | $AV_s$ (%) |      |       |
|------|------------|------|------|------------|------|-------|
|      | x&y        | y&z  | x&z  | x&y        | y&z  | x&z   |
| -0.1 | 4.39       | 2.30 | 6.69 | 5.65       | 6.34 | 11.98 |
| 0.2  | 3.52       | 1.38 | 4.91 | 5.13       | 5.41 | 10.54 |
| 0.4  | 3.16       | 1.09 | 4.25 | 4.96       | 5.33 | 10.28 |
| 0.6  | 2.82       | 1.04 | 3.86 | 4.98       | 5.71 | 10.68 |
| 0.8  | 2.89       | 1.29 | 4.19 | 5.00       | 5.73 | 10.73 |
| 1.0  | 2.78       | 1.36 | 4.14 | 4.81       | 5.52 | 10.37 |
| 1.2  | 2.62       | 1.30 | 3.92 | 4.83       | 5.55 | 10.30 |
| 1.4  | 2.39       | 1.06 | 3.45 | 4.52       | 5.21 | 9.73  |
